# Supplementary material for: UL11 Protein Is a Key Participant of the Duck Plague Virus in Its Life Cycle
Source: PubMed Central journal article supplement (PMC8764364; doi:10.3389/fmicb.2021.792361), 2022-01-04

# Original image data used in the article

Figure 1A

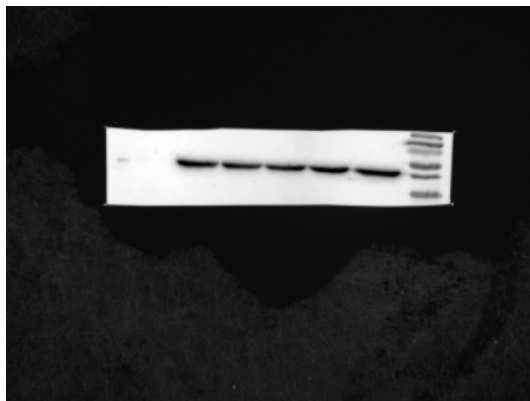

$\beta$ -actin

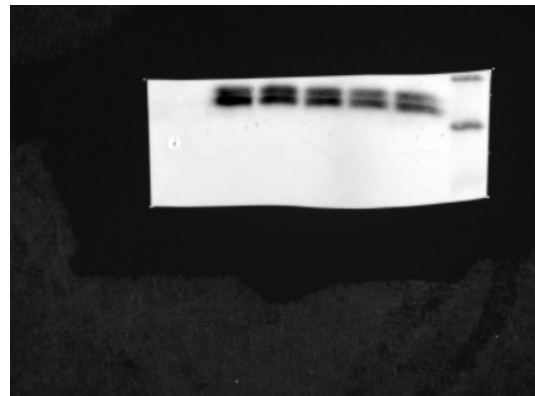

UL11

Figure 2E

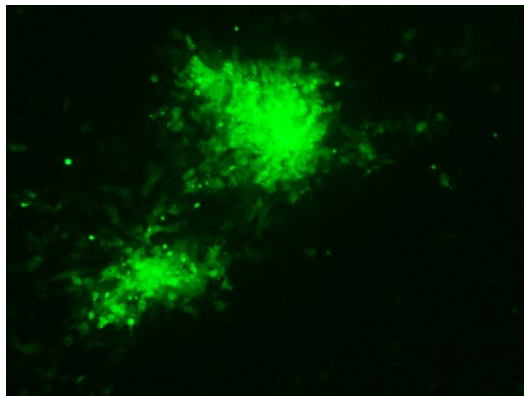

shRNAneo

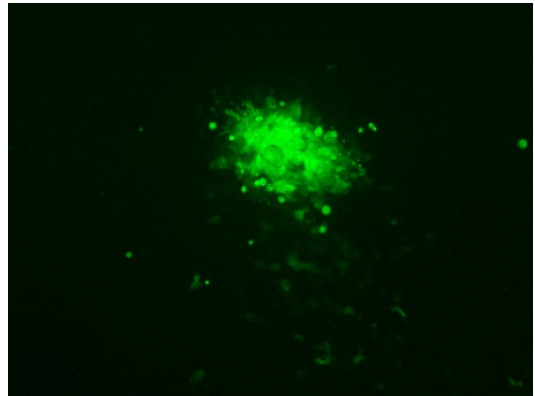

shRNA126

Figure 3

shRNA126:

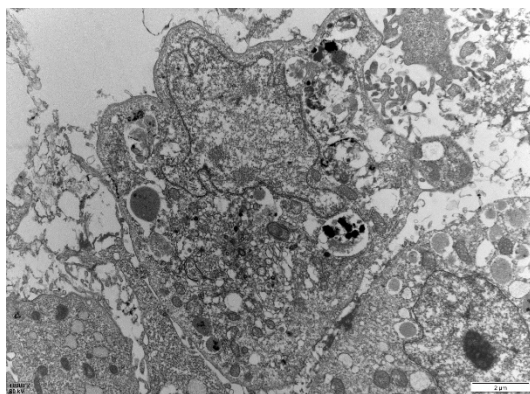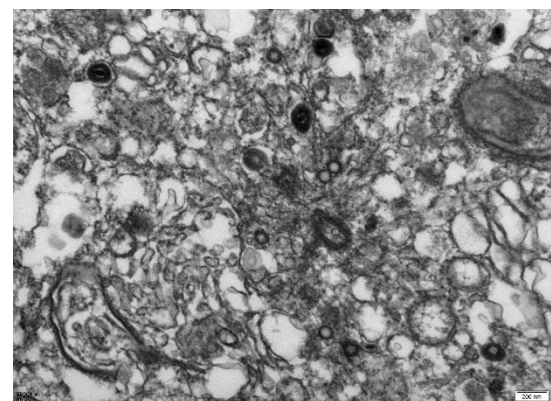



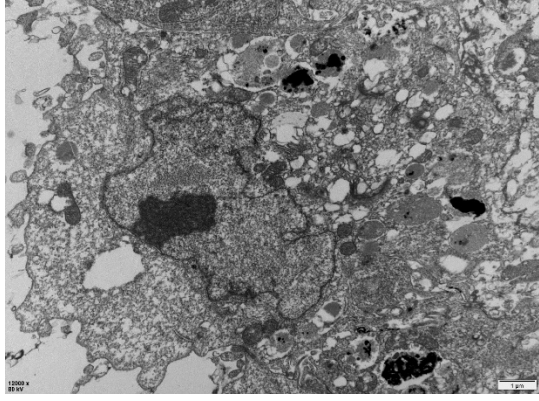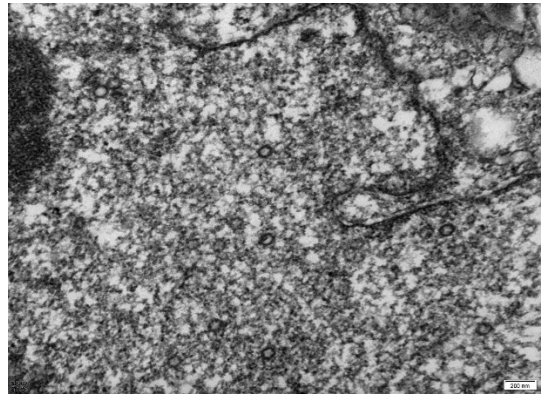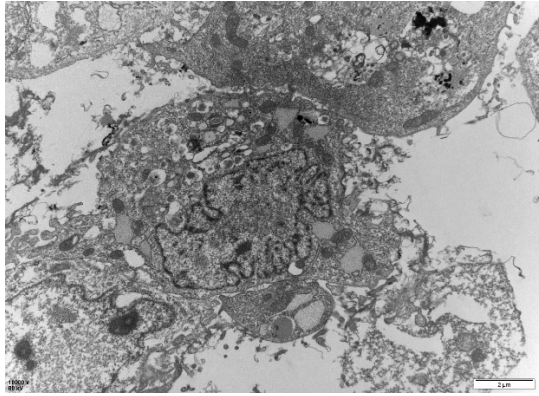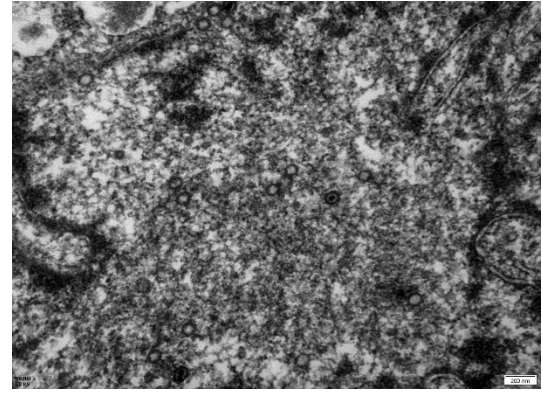

shRNAneo:

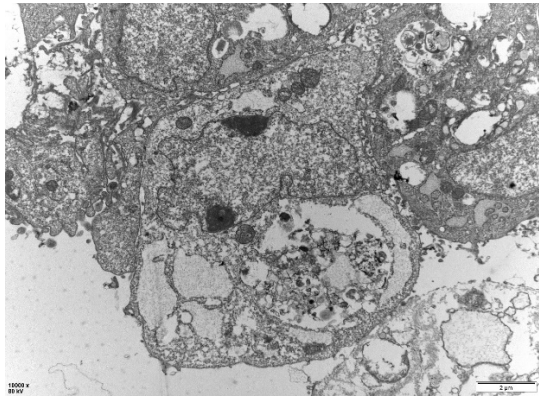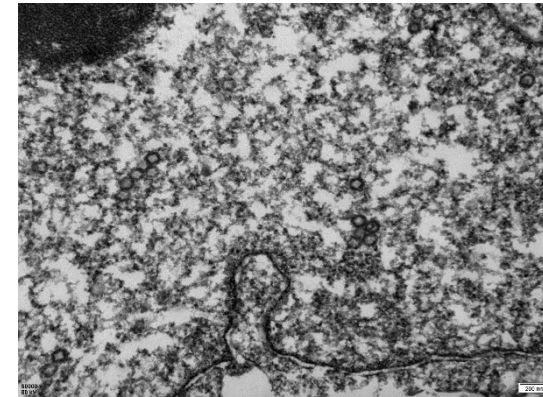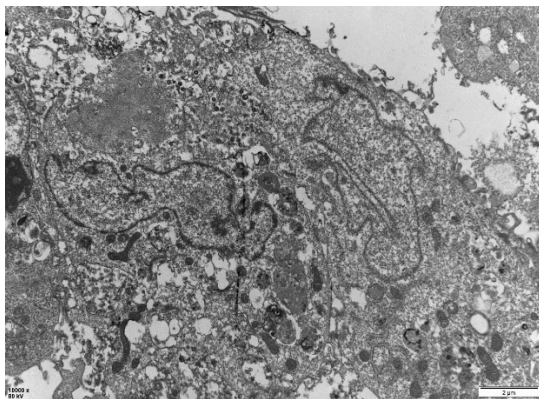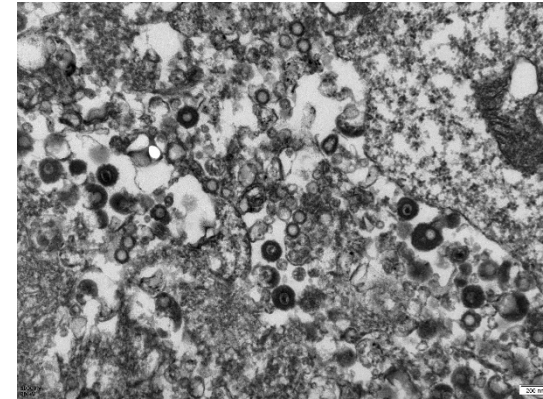



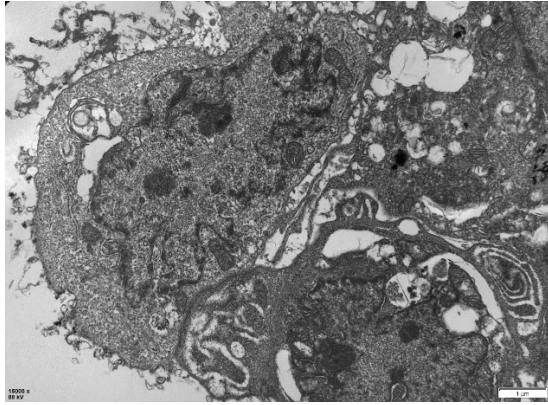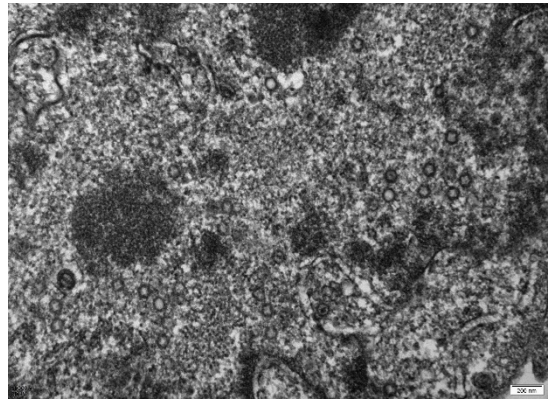

Figure 5A

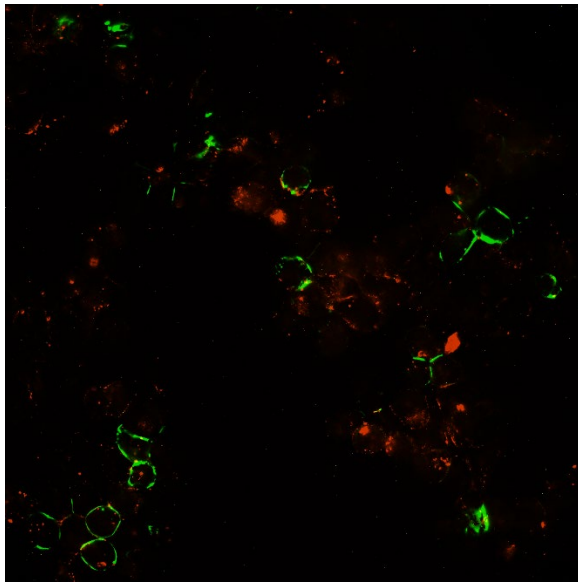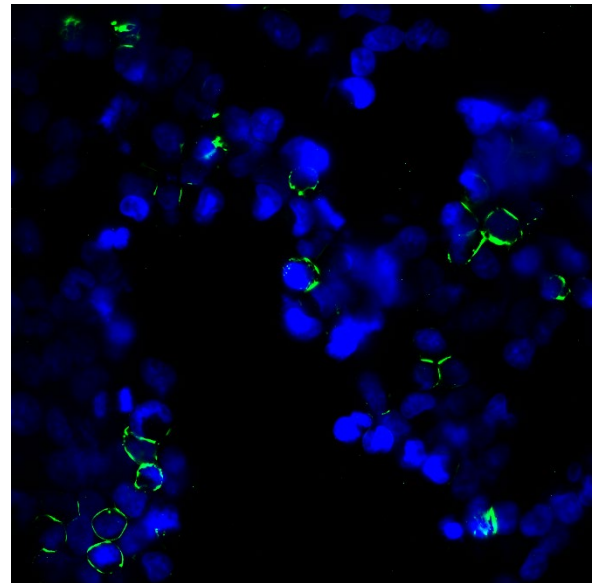

Figure 5C

UL11

PHB

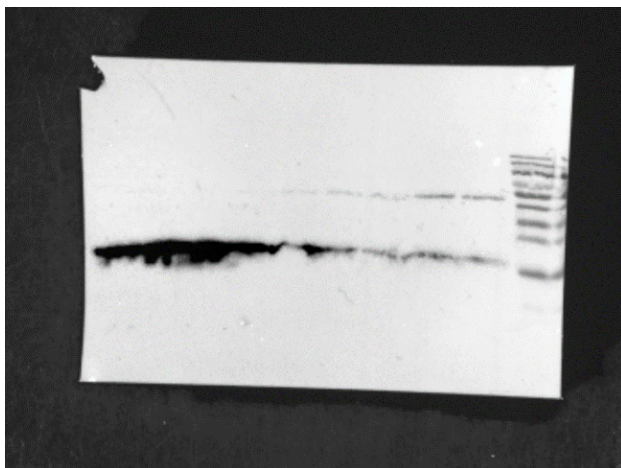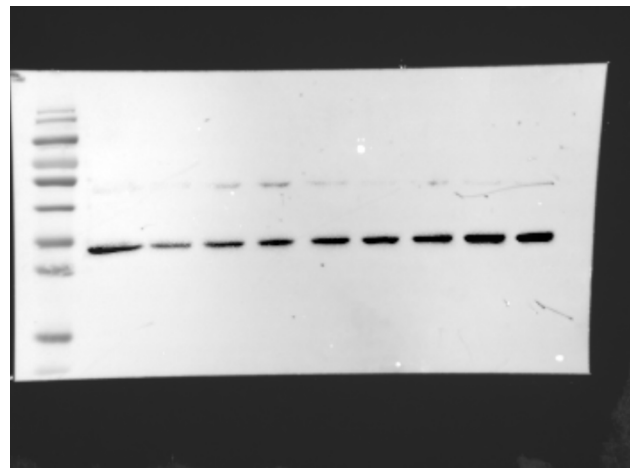

FLOT1

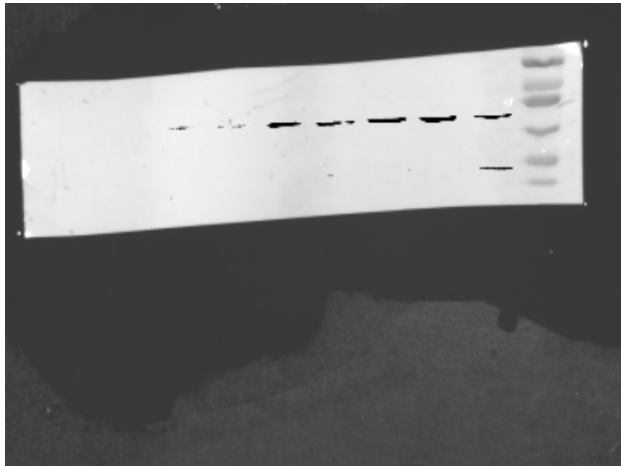

Figure 5D  
UL11G2A

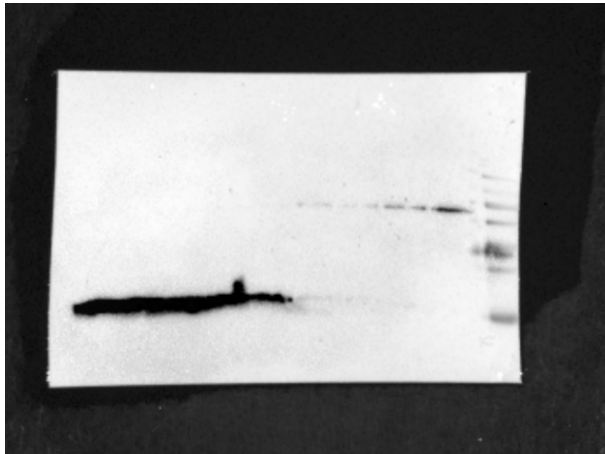

PHB

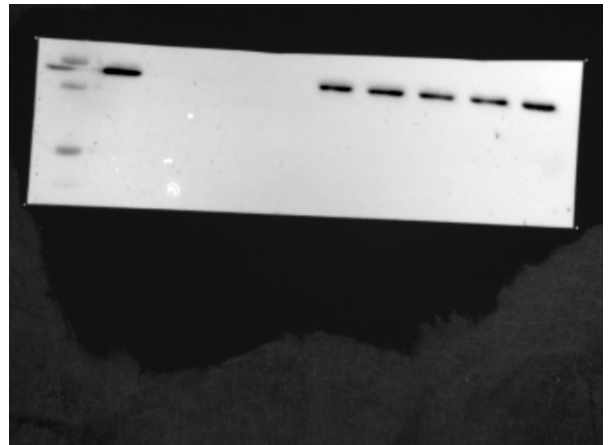

FLOT1

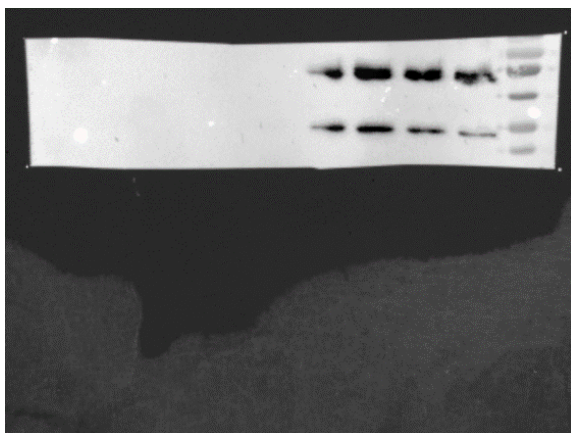

Figure 6C

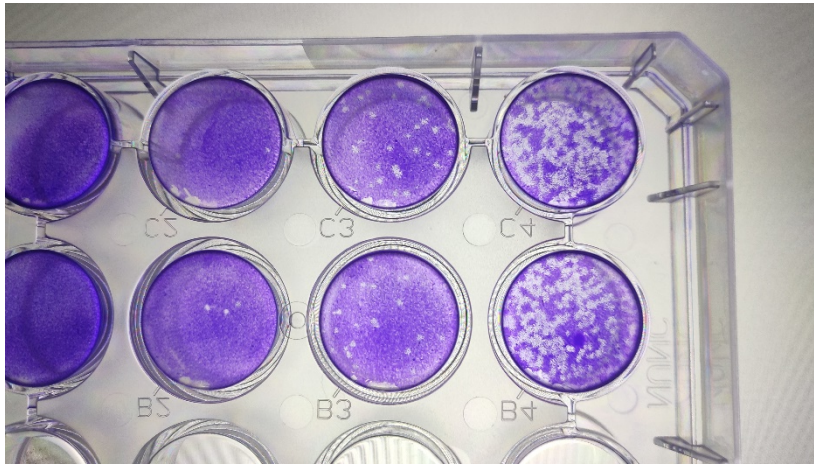

Supplement: Data_Sheet_1.pdf [file Data_Sheet_1.pdf]
